# Supplementary material for: Fit-for-Purpose Assessment of QuEChERS LC-MS/MS Methods for Environmental Monitoring of Organotin Compounds in the Bottom Sediments of the Odra River Estuary
Source: MDPI journal article supplement (doi:10.3390/molecules27154847), 2022-07-28
Supplement: s1 [file s1]

# Fit-for-Purpose Assessment of QuEChERS LC-MS/MS Methods for Environmental Monitoring of Organotin Compounds in the Bottom Sediments of the Odra River Estuary

**Table S1.** Parameters of QuEChERS and ISO 23161 extraction procedures.

| Parameters                          | QuEChERS                                                                                                        | ISO 23161                                                                                             |
|-------------------------------------|-----------------------------------------------------------------------------------------------------------------|-------------------------------------------------------------------------------------------------------|
| Sample mass [g]                     | 0.125                                                                                                           | 1-5                                                                                                   |
| Initial solution                    | Water                                                                                                           | Acetic acid:methanol:water (1:1:1; v/v/v)                                                             |
| The volume of initial solution [ml] | 0.2                                                                                                             | 9                                                                                                     |
| Extractant solution                 | ACN + 5% formic acid                                                                                            | Hexane +10% sodium tetraethylborate in tetrahydrofurane                                               |
| Volume of extractant solution [ml]  | 0.25                                                                                                            | 5                                                                                                     |
| Internal standard                   | TBT-d27                                                                                                         | TBT-d27                                                                                               |
| Extraction procedure                | 1 <sup>st</sup> step- 5 minutes of ultrasound extraction<br>2 <sup>nd</sup> step- 15 minutes shaking (1500 rpm) | 1 <sup>st</sup> step - 30 minutes ultrasound extraction with 3 extractants - three times              |
|                                     |                                                                                                                 | 2 <sup>nd</sup> step - Collection of the liquid phase                                                 |
|                                     |                                                                                                                 | 3 <sup>rd</sup> step - Adjustment the pH of the collected liquid phase to 4.5                         |
|                                     |                                                                                                                 | 4 <sup>th</sup> step - Shaking the liquid phase with the organic phase twice for 20 minutes (150 rpm) |
|                                     |                                                                                                                 | 5 <sup>th</sup> step - Evaporation of the collected organic phase to 1 ml                             |

**Table S2.** Separation and detection parameters of LC-MS/MS, GC-AED, and, GC-MS techniques.

| Parameters                 | QuEChERS-LC-MS/MS                                                                                                                                                                                                                                                                                                       | ISO GC-AED                                                                                                                                                                                                                                                                                                               |
|----------------------------|-------------------------------------------------------------------------------------------------------------------------------------------------------------------------------------------------------------------------------------------------------------------------------------------------------------------------|--------------------------------------------------------------------------------------------------------------------------------------------------------------------------------------------------------------------------------------------------------------------------------------------------------------------------|
| Chromatographic separation | Liquid chromatograph Agilent 1260 Infinity (Agilent Technologies, Santa Clara, CA, US)                                                                                                                                                                                                                                  | Gas chromatograph GC 7890A ( Agilent Technologies, USA)                                                                                                                                                                                                                                                                  |
| Chromatography column      | Kinetex RP-18 column (100 mm, 4.6 mm, particle size 2.6 µm) supplied by Phenomenex (Torrance, CA, USA)<br>Column temperature- 40°C;<br>Eluent flow rate- 0.5 ml/min.                                                                                                                                                    | HP-5MS column (30m, 0.25 mm I.D., 0.25 µm particle size (Agilent Technologies, USA)                                                                                                                                                                                                                                      |
| Separation parameters      | The eluent was prepared from two solutions: A- 0.2% formic acid in water and B- 0.2% formic acid in acetonitrile. The concentration of solution B in the eluent was 5% for 2 minutes, after that, the concentration increased to 95% in 7.5 minutes and for the next 5 minutes was 95%. The injection volume was 10 µl. | Injection: splitless for 60 s, injection volume: 5 µl<br>Injection temperature: 280 °C<br>Carrier: helium (1 ml/min) constant flow<br>The temperature gradient of the column: 40°C for 3 min, then increase to 220°C with 10°C/min rate, held for 5 min, then increase to 300 °C with 20°C/min rate, and held for 10 min |
| Detector                   | Triple Quadrupole/Linear Ion trap mass spectrometer (QTRAP® 4000, AB SCIEX, Framingham, MA, US)                                                                                                                                                                                                                         | <u>Atomic emission spectrometric detector</u> : AED JAS G2350A (JAS, Germany)                                                                                                                                                                                                                                            |

|                      |                                                                                                                                                                                                                                                                        |                                                                                                                                                                                                                                                                                                                                                                                                                     |
|----------------------|------------------------------------------------------------------------------------------------------------------------------------------------------------------------------------------------------------------------------------------------------------------------|---------------------------------------------------------------------------------------------------------------------------------------------------------------------------------------------------------------------------------------------------------------------------------------------------------------------------------------------------------------------------------------------------------------------|
| Detection parameters | The curtain gas, ion source gas 1, ion source gas 2, and collision gas (all high purity nitrogen) were set at 280 kPa, 380 kPa, 410 kPa, and “high” instrument units, respectively. The ion spray voltage and source temperatures were 5500 V and 600°C, respectively. | <u>Mass spectrometer:</u> Agilent 5973c Network Mass Selective Detector, (Agilent Technologies, USA)                                                                                                                                                                                                                                                                                                                |
|                      |                                                                                                                                                                                                                                                                        | <u>Atomic emission spectrometric detector:</u><br>Transfer line temperature: 280°C<br>Cavity temperature: 280°C<br>The line for Sn: 301nm, 303 nm<br>Gases: hydrogen (50 psi), oxygen (14 psi)<br>Helium makes up: 270ml/min<br><u>Mass spectrometer:</u><br>MSD transfer line temperature: 300 °C<br>Acquisition mode: SCAN<br>Ionization voltage:70eV<br>Source temperature:230°C<br>Quadrupole temperature 150°C |

**Table S3.** Granulometric composition (% of silt fraction and % of clay fraction) and content in mg·kg<sup>-1</sup> of total organic carbon (TOC), total nitrogen content (N), acid volatile sulfur (AVS), and total phosphorus (P) of sediments collected from the Odra River estuary.

| Sample number | Silt [%] | Clay [%] | TOC [g·kg <sup>-1</sup> ] | N [g·kg <sup>-1</sup> ] | AVS [g·kg <sup>-1</sup> ] | P [g·kg <sup>-1</sup> ] |
|---------------|----------|----------|---------------------------|-------------------------|---------------------------|-------------------------|
| S1            | 97.2     | 2.8      | 13.6                      | 3.5                     | 1.7                       | 0.34                    |
| S2            | 96.7     | 3.3      | 115.0                     | 14.0                    | 11.7                      | 1.04                    |
| S3            | 97.3     | 2.7      | 92.7                      | 10.5                    | 8.2                       | 1.15                    |
| S4            | 96.6     | 3.4      | 97.3                      | 9.1                     | 5.6                       | 2.02                    |
| S5            | 96.5     | 3.5      | 154                       | 13.7                    | 9.0                       | 2.13                    |
| S6            | 95.5     | 4.5      | 88.1                      | 6.6                     | 3.5                       | 2.97                    |
| S7            | 95.7     | 4.3      | 70.7                      | 5.3                     | 1.2                       | 2.08                    |
| S8            | 95.5     | 4.5      | 75.7                      | 8.2                     | 2.7                       | 3.85                    |
| S9            | 94.6     | 5.4      | 24.1                      | 2.4                     | 0.8                       | 1.52                    |
| S10           | 96.2     | 3.8      | 91.3                      | 9.1                     | 1.0                       | 1.36                    |
